# Supplementary material for: Bacterial fumarase and L-malic acid are evolutionary ancient components of the DNA damage response
Source: eLife journal article supplement (doi:10.7554/elife.30927), 2017-11-15
Supplement: supp [file elife-30927-supp-v1.zip]

Archive with 13 entries (13 files):
- elife_poa_e30927_Figure_3_figure_supplement_4.pdf
- elife_poa_e30927_Figure_1_figure_supplement_1.tif
- elife_poa_e30927_Figure_2_figure_supplement_1.pdf
- elife_poa_e30927_Figure_3_figure_supplement_3.pdf
- elife_poa_e30927_Figure_2_figure_supplement_2.pdf
- elife_poa_e30927_Supplementary_File_1.docx
- elife_poa_e30927_Supplementary_File_2.docx
- elife_poa_e30927_Figure_1_figure_supplement_3.tif
- elife_poa_e30927_Figure_1_figure_supplement_2.tif
- elife_poa_e30927_Figure_3_figure_supplement_2.pdf
- elife_poa_e30927_Figure_3_figure_supplement_1.tif
- elife_poa_e30927_Figure_4_figure_supplement_1.pdf
- elife_poa_e30927_Transparent_Reporting_File.docx
