# Supplementary material for: Bacterial fumarase and L-malic acid are evolutionary ancient components of the DNA damage response
Source: eLife journal article supplement (doi:10.7554/elife.30927), 2017-11-15
Supplement: supp [file elife-30927-supp-v1.zip › elife_poa_e30927_Figure_3_figure_supplement_4.pdf]

**Strain**

WT

$\Delta$ fum

WT MMS

$\Delta$ fum MMS

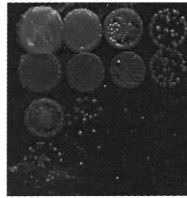

Buffer

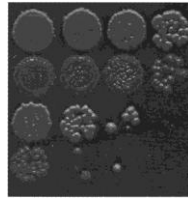

mono-ethyl  
succinate

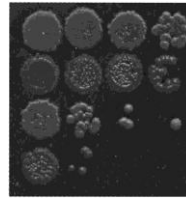

mono-ethyl  
fumarate

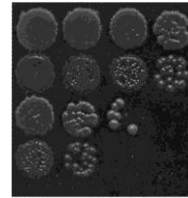

diethylmalate
