# Supplementary figures and images for: Bacterial fumarase and L-malic acid are evolutionary ancient components of the DNA damage response
Source: eLife journal article supplement (doi:10.7554/elife.30927), 2017-11-15

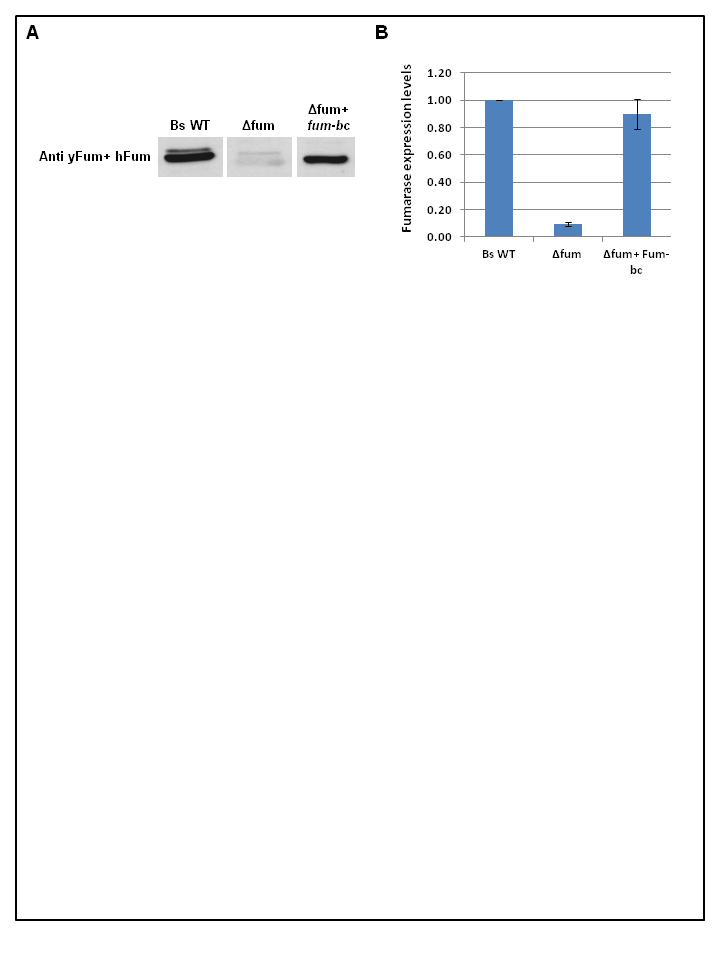

Supplement: supp [file elife-30927-supp-v1.zip › elife_poa_e30927_Figure_1_figure_supplement_1.tif]

**A**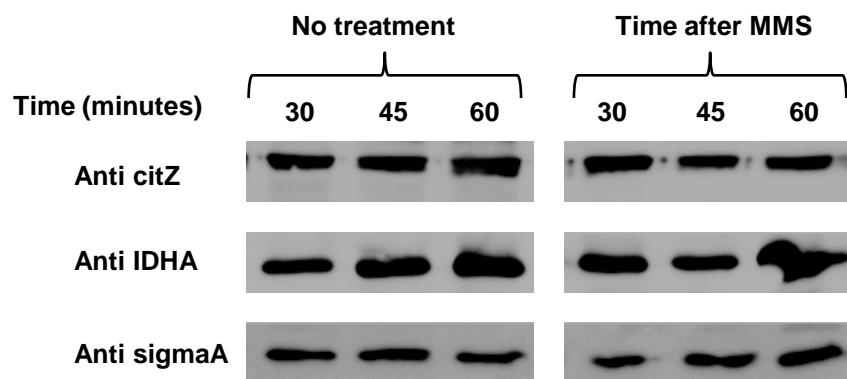**B**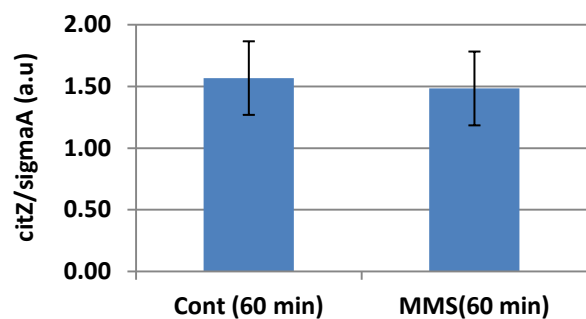**C**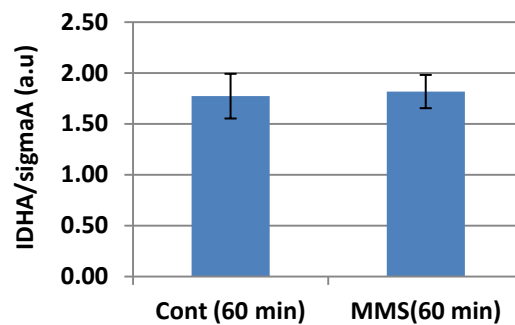

Supplement: supp [file elife-30927-supp-v1.zip › elife_poa_e30927_Figure_2_figure_supplement_1.pdf]

**Strain**

**WT**

**$\Delta$ fum**

***H127R***

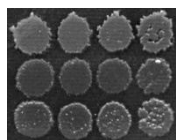

**No treatment**

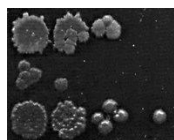

**MMS**

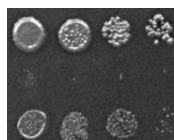

**S7**

Supplement: supp [file elife-30927-supp-v1.zip › elife_poa_e30927_Figure_3_figure_supplement_3.pdf]

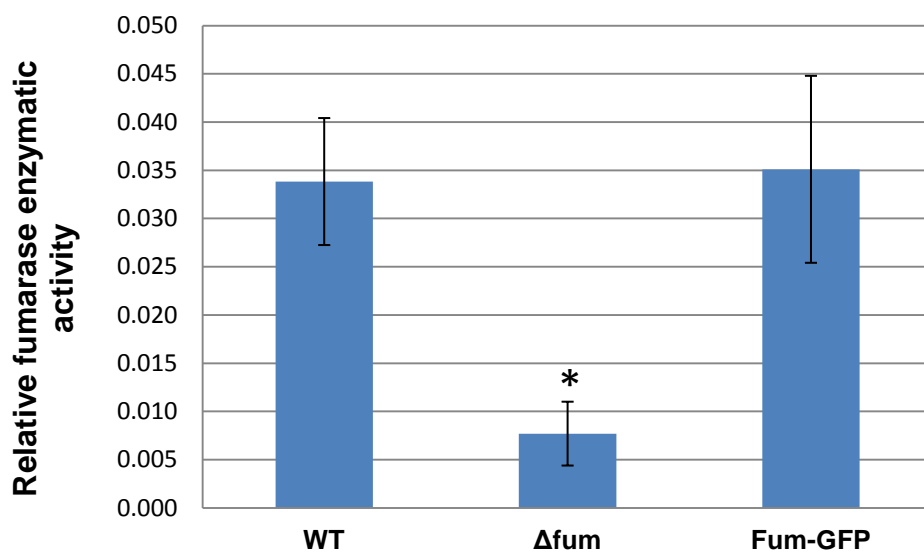

Supplement: supp [file elife-30927-supp-v1.zip › elife_poa_e30927_Figure_2_figure_supplement_2.pdf]

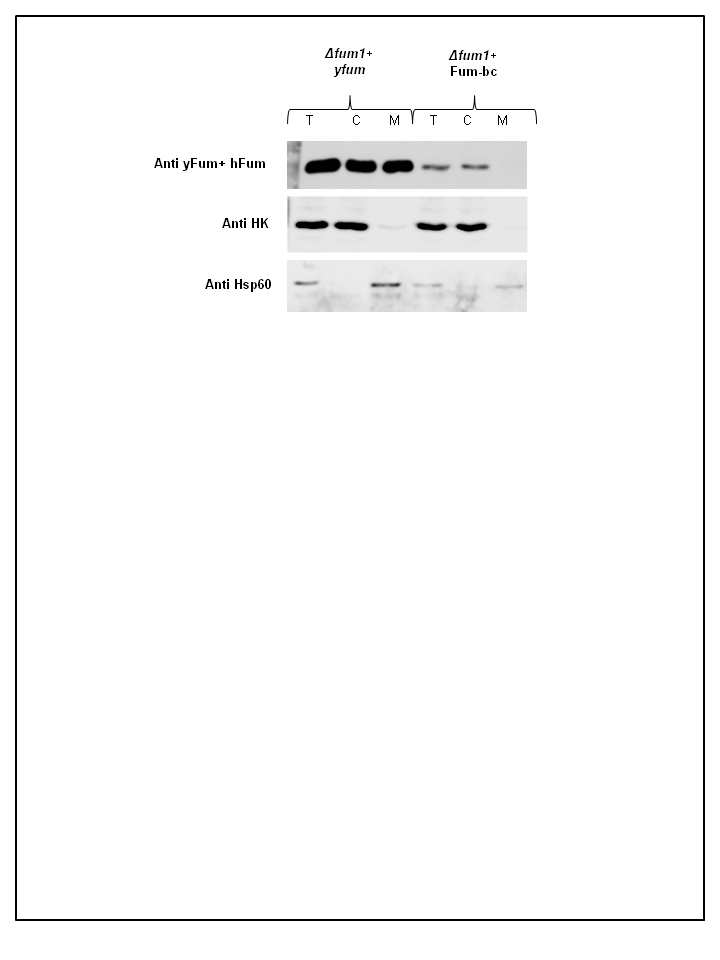

Supplement: supp [file elife-30927-supp-v1.zip › elife_poa_e30927_Figure_1_figure_supplement_3.tif]

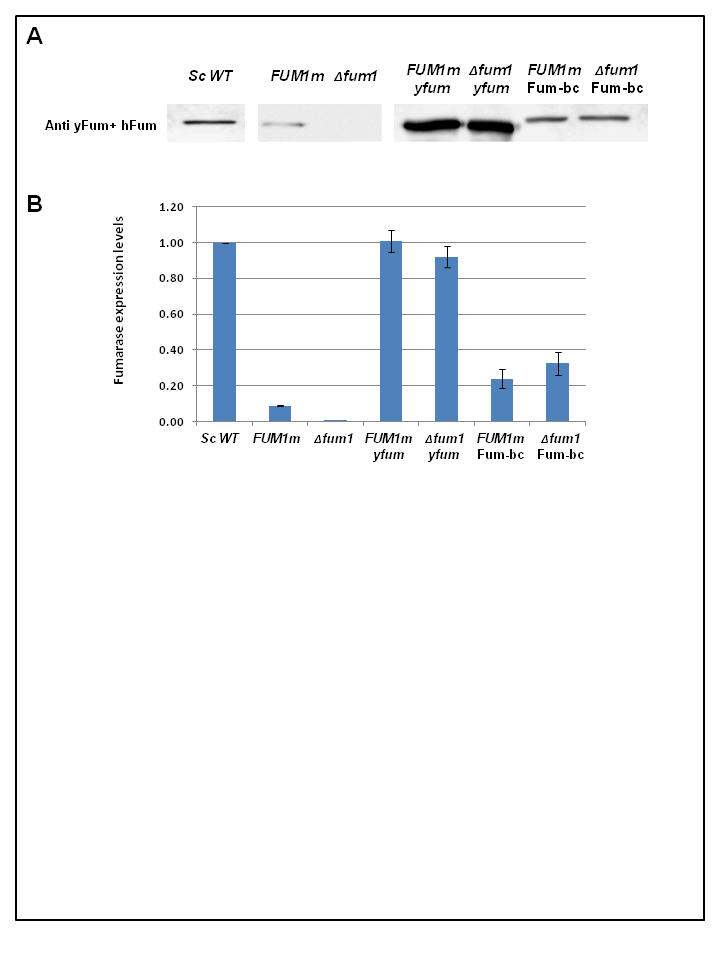

Supplement: supp [file elife-30927-supp-v1.zip › elife_poa_e30927_Figure_1_figure_supplement_2.tif]

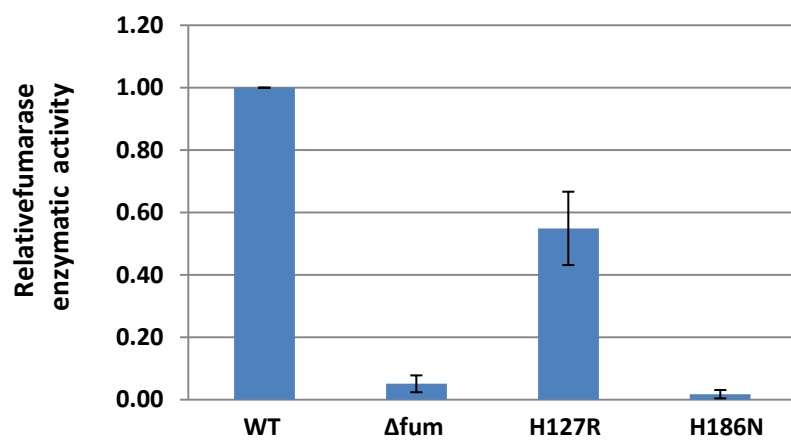

Supplement: supp [file elife-30927-supp-v1.zip › elife_poa_e30927_Figure_3_figure_supplement_2.pdf]

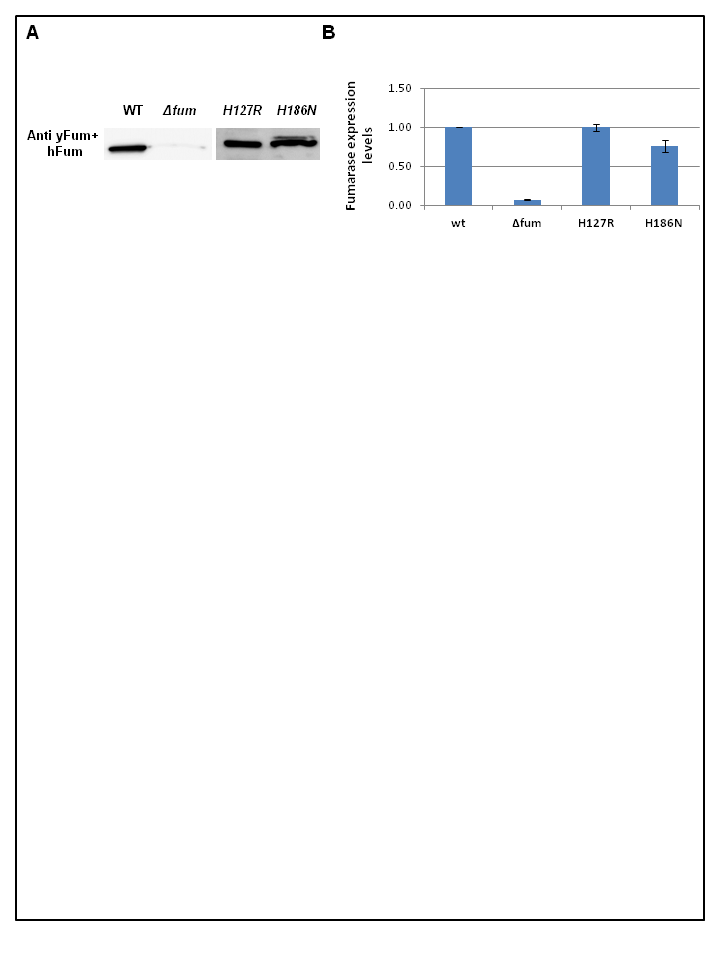

Supplement: supp [file elife-30927-supp-v1.zip › elife_poa_e30927_Figure_3_figure_supplement_1.tif]

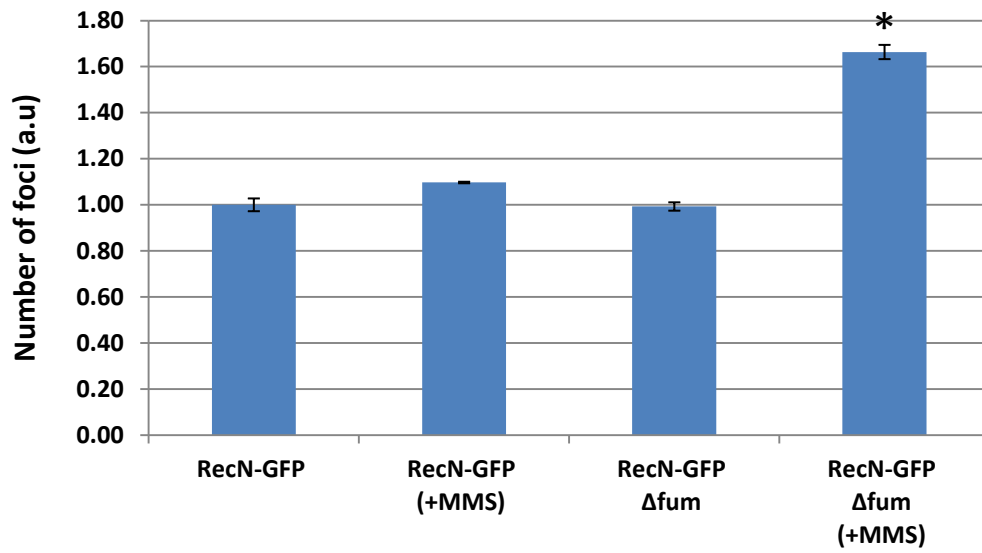

Supplement: supp [file elife-30927-supp-v1.zip › elife_poa_e30927_Figure_4_figure_supplement_1.pdf]
